# Supplementary material
Source: MDPI journal article supplement (https://www.mdpi.com/1996-1073/14/21/7251)

Table S1: Parameters used in each sub-model and data sources

| Sub-model  | Parameter                                 | Value                                                                      | Units     | Data source                                                                                                                                                                                                                                                                                                                                                                                                                                                                                                                                                                                 |
|------------|-------------------------------------------|----------------------------------------------------------------------------|-----------|---------------------------------------------------------------------------------------------------------------------------------------------------------------------------------------------------------------------------------------------------------------------------------------------------------------------------------------------------------------------------------------------------------------------------------------------------------------------------------------------------------------------------------------------------------------------------------------------|
| Economy    | Initial gross value add rate              | 19,896,800,000                                                             | Rand      | Drakenstein socio-economic profile, page 26.<br><a href="https://www.westerncape.gov.za/provincial-treasury/files/atoms/files/WC023%20Drakenstein%202018%20Socio-economic%20Profile%20%28SEP-LG%29%20F.pdf">https://www.westerncape.gov.za/provincial-treasury/files/atoms/files/WC023%20Drakenstein%202018%20Socio-economic%20Profile%20%28SEP-LG%29%20F.pdf</a>                                                                                                                                                                                                                           |
|            | Baseline gross values add growth          | 0.0175                                                                     | Dmnl/year | Estimated based on Drakenstein socio-economic report, page 26.<br><a href="https://www.westerncape.gov.za/provincial-treasury/files/atoms/files/WC023%20Drakenstein%202018%20Socio-economic%20Profile%20%28SEP-LG%29%20F.pdf">treasury/files/atoms/files/WC023%20Drakenstein%202018%20Socio-economic%20Profile%20%28SEP-LG%29%20F.pdf</a><br>The trend in 2006-2016 is 2.4% while in 2013 – 2017 it is 1.7%. The real growth rate from 2013 to 2016 has ranged from a low of 0.7% (in 2016) to a high of 2.6% (in 2013). Used average growth rate over the period 2011-2018 which is 1.75%. |
| Population | Initial population                        | Contains 102 age cohorts including newborn and age 0, and age 1 to age 100 | Person    | In age cohorts. Estimated using 2011 age breakdown but using 2016 population data. 2011 population data by sex data from STATS SA. 2016 population data source is Drakenstein socio-economic profile<br><a href="https://www.westerncape.gov.za/provincial-treasury/files/atoms/files/WC023%20Drakenstein%202018%20Socio-economic%20Profile%20%28SEP-LG%29%20F.pdf">https://www.westerncape.gov.za/provincial-treasury/files/atoms/files/WC023%20Drakenstein%202018%20Socio-economic%20Profile%20%28SEP-LG%29%20F.pdf</a>                                                                   |
|            | Net migration rate                        | 0.0045                                                                     | Dmnl/year | Estimated through calibration.                                                                                                                                                                                                                                                                                                                                                                                                                                                                                                                                                              |
|            | Desired number of children                | 3.9                                                                        | Dmnl      | Based on average household size data from STATS SA.                                                                                                                                                                                                                                                                                                                                                                                                                                                                                                                                         |
|            | Proportion using conscious control        | 0.35                                                                       | Dmnl      | Estimated through calibration.                                                                                                                                                                                                                                                                                                                                                                                                                                                                                                                                                              |
|            | Unconsciously desired fertility           | 5.8                                                                        | Dmnl      | Estimated through calibration.                                                                                                                                                                                                                                                                                                                                                                                                                                                                                                                                                              |
|            | Initial population growth rate            | 0.0256                                                                     | Dmnl/year | Based on the estimate in the STATS SA.<br><a href="http://www.statssa.gov.za/?page_id=993&amp;id=drakenstein-municipality">http://www.statssa.gov.za/?page_id=993&amp;id=drakenstein-municipality</a>                                                                                                                                                                                                                                                                                                                                                                                       |
|            | Death rate                                | 0.015                                                                      | Dmnl/year | Estimated through calibration.                                                                                                                                                                                                                                                                                                                                                                                                                                                                                                                                                              |
|            | Proportion of female babies               | 0.49                                                                       | Dmnl      | Calculated from the number of children in ages 0-4 years.                                                                                                                                                                                                                                                                                                                                                                                                                                                                                                                                   |
|            | Normal life expectancy                    | 57                                                                         | Year      | Using the life expectancy data provided by STATS SA -<br><a href="http://www.statssa.gov.za/?p=2973">http://www.statssa.gov.za/?p=2973</a>                                                                                                                                                                                                                                                                                                                                                                                                                                                  |
|            | Time horizon to measure population growth | 1                                                                          | Year      | It takes a year to estimate annual population growth.                                                                                                                                                                                                                                                                                                                                                                                                                                                                                                                                       |
| Households | Initial household size                    | 71686                                                                      | Household | Based on Socio-economic data 2018 report.<br><br>The number is for 2016                                                                                                                                                                                                                                                                                                                                                                                                                                                                                                                     |

|                                         |                                                     |                                                                                                                                                      |                    |                                                                                                                                                                                      |
|-----------------------------------------|-----------------------------------------------------|------------------------------------------------------------------------------------------------------------------------------------------------------|--------------------|--------------------------------------------------------------------------------------------------------------------------------------------------------------------------------------|
|                                         | Average household size                              | 3.9                                                                                                                                                  | Dmnl               | Based on stats SA data, which is 3.9.                                                                                                                                                |
|                                         | Initial share of population in each settlement area | 0.903 (formal electrified)<br>0.001 (formal not electrified)<br>0.1 (Informal electrified)<br>0.04 (informal not electrified)<br>0.008 (backyarders) | Dmnl               | Based on Drakenstein socio-economic profile<br>WC023 Drakenstein 2018 Socio-economic Profile (SEP-LG) F.pdf                                                                          |
|                                         | Proportion of female headed population              | 0.336                                                                                                                                                | Dmnl               | Used 2011 data on type of dwelling from STATS SA.                                                                                                                                    |
|                                         | Informal proportion of female headed                | 0.6                                                                                                                                                  | Dmnl               | Using a proportion of female-headed female based on Groenheuwel Survey data. Kovacic et al (2017) found similar proportions in three case studies in South Africa, Kenya and Uganda. |
| Energy affordability                    | Initial energy affordability                        | 1                                                                                                                                                    | Dmnl               | Affordability can range from 0 to 1                                                                                                                                                  |
|                                         | Energy price by energy source                       | Electricity -308055,<br>LPG -481653,<br>Paraffin - 156101,<br>Biomass - 246914                                                                       | Rand/TJ            | Estimated from Cape Town Municipality energy balance.<br><a href="https://africancityenergy.org/uploads/resource_22.pdf">https://africancityenergy.org/uploads/resource_22.pdf</a>   |
| Household energy demand and consumption | Initial energy efficiency                           | 1                                                                                                                                                    | Dmnl               |                                                                                                                                                                                      |
|                                         | Demand for lighting per household                   | 324                                                                                                                                                  | kWh/household/year | Estimated from Cape Town Municipality energy balance.<br><a href="https://africancityenergy.org/uploads/resource_22.pdf">https://africancityenergy.org/uploads/resource_22.pdf</a>   |
|                                         | Demand for electronics per household                | 70.2                                                                                                                                                 | kWh/household/year | Estimated from Cape Town Municipality energy balance.<br><a href="https://africancityenergy.org/uploads/resource_22.pdf">https://africancityenergy.org/uploads/resource_22.pdf</a>   |
|                                         | Demand for white appliances per household           | 374.4                                                                                                                                                | kWh/household/year | Estimated from Cape Town Municipality energy balance.<br><a href="https://africancityenergy.org/uploads/resource_22.pdf">https://africancityenergy.org/uploads/resource_22.pdf</a>   |
|                                         | Demand for space heating per household              | 1350                                                                                                                                                 | kWh/household/year | Estimated from Cape Town Municipality energy balance.<br><a href="https://africancityenergy.org/uploads/resource_22.pdf">https://africancityenergy.org/uploads/resource_22.pdf</a>   |
|                                         | Demand for water heating per household              | 540                                                                                                                                                  | kWh/household/year | Estimated from Cape Town Municipality energy balance.<br><a href="https://africancityenergy.org/uploads/resource_22.pdf">https://africancityenergy.org/uploads/resource_22.pdf</a>   |
|                                         | Demand for cooking per household                    | 675                                                                                                                                                  | kWh/household/year | Estimated from Cape Town Municipality energy balance.<br><a href="https://africancityenergy.org/uploads/resource_22.pdf">https://africancityenergy.org/uploads/resource_22.pdf</a>   |

|                              |                                                                  |                                                                                                                                                                       |            |                                                                                                                                                                                                                                                                                                                                                 |
|------------------------------|------------------------------------------------------------------|-----------------------------------------------------------------------------------------------------------------------------------------------------------------------|------------|-------------------------------------------------------------------------------------------------------------------------------------------------------------------------------------------------------------------------------------------------------------------------------------------------------------------------------------------------|
| Energy price and expenditure | Energy price by energy source                                    | Electricity - 308 055,<br>LPG - 481 653,<br>Paraffin - 156 101,<br>Biomass - 246 914                                                                                  | Rand/TJ    | Estimated from Cape Town Municipality energy balance.<br><a href="https://africancityenergy.org/uploads/resource_22.pdf">https://africancityenergy.org/uploads/resource_22.pdf</a>                                                                                                                                                              |
| Technology options           | Initial share of demand for water heating by off-grid renewables | Formal electrified - 0,<br>Formal not electrified - 2.98023e-08,<br>Informal electrified - 0,<br>Informal not electrified - 2.98023e-08,<br>Backyarders - 2.98023e-08 | dmnl       | The demand focusses on dwellings with no grid connection. The proportions are estimated per household.                                                                                                                                                                                                                                          |
| Socio-environmental impact   | Social cost of carbon per ton of air emissions                   | 31                                                                                                                                                                    | USD/tonCO2 |                                                                                                                                                                                                                                                                                                                                                 |
|                              | Unit cost of fires                                               | 60962                                                                                                                                                                 | Rand/fire  | Data from CCT Fire and Rescue Services Department.                                                                                                                                                                                                                                                                                              |
|                              | Unit cost of paraffin                                            | (4.39802 + 0.0805382) * 1000                                                                                                                                          | R/TJ       | Estimated from Cape Town Municipality energy balance.<br><a href="https://africancityenergy.org/uploads/resource_22.pdf">https://africancityenergy.org/uploads/resource_22.pdf</a>                                                                                                                                                              |
|                              | Unit cost of paraffin burns                                      | 3 * 1000                                                                                                                                                              | R/TJ       | Estimated from Cape Town Municipality energy balance.<br><a href="https://africancityenergy.org/uploads/resource_22.pdf">https://africancityenergy.org/uploads/resource_22.pdf</a>                                                                                                                                                              |
|                              | Unit cost of paraffin ingestion                                  | 3.74983 * 1000                                                                                                                                                        |            | Estimated from Cape Town Municipality energy balance.<br><a href="https://africancityenergy.org/uploads/resource_22.pdf">https://africancityenergy.org/uploads/resource_22.pdf</a>                                                                                                                                                              |
|                              | Air emissions by source                                          | Electricity -111,<br>LPG - 65.5,<br>Paraffin - 69.6,<br>Biomass - 112                                                                                                 | TonCo2/TJ  | Calculated based on CO2 emission factors for fossil fuels.<br><a href="https://www.umweltbundesamt.de/sites/default/files/medien/1968/publikationen/co2_emission_factors_for_fossil_fuels_correction.pdf">https://www.umweltbundesamt.de/sites/default/files/medien/1968/publikationen/co2_emission_factors_for_fossil_fuels_correction.pdf</a> |
|                              | Fire risk by source                                              | Electricity 0.001,<br>LPG - 0,<br>Paraffin - 0.065,<br>Biomass - 0.065                                                                                                | Fire/TJ    | Data on fire frequency and cause from CCT Fire and Rescue Services Department, then divided by the amount of energy consumed, by energy source.                                                                                                                                                                                                 |

Note: TJ is terajoules

**Figure S1\_Criteria for input data collection**

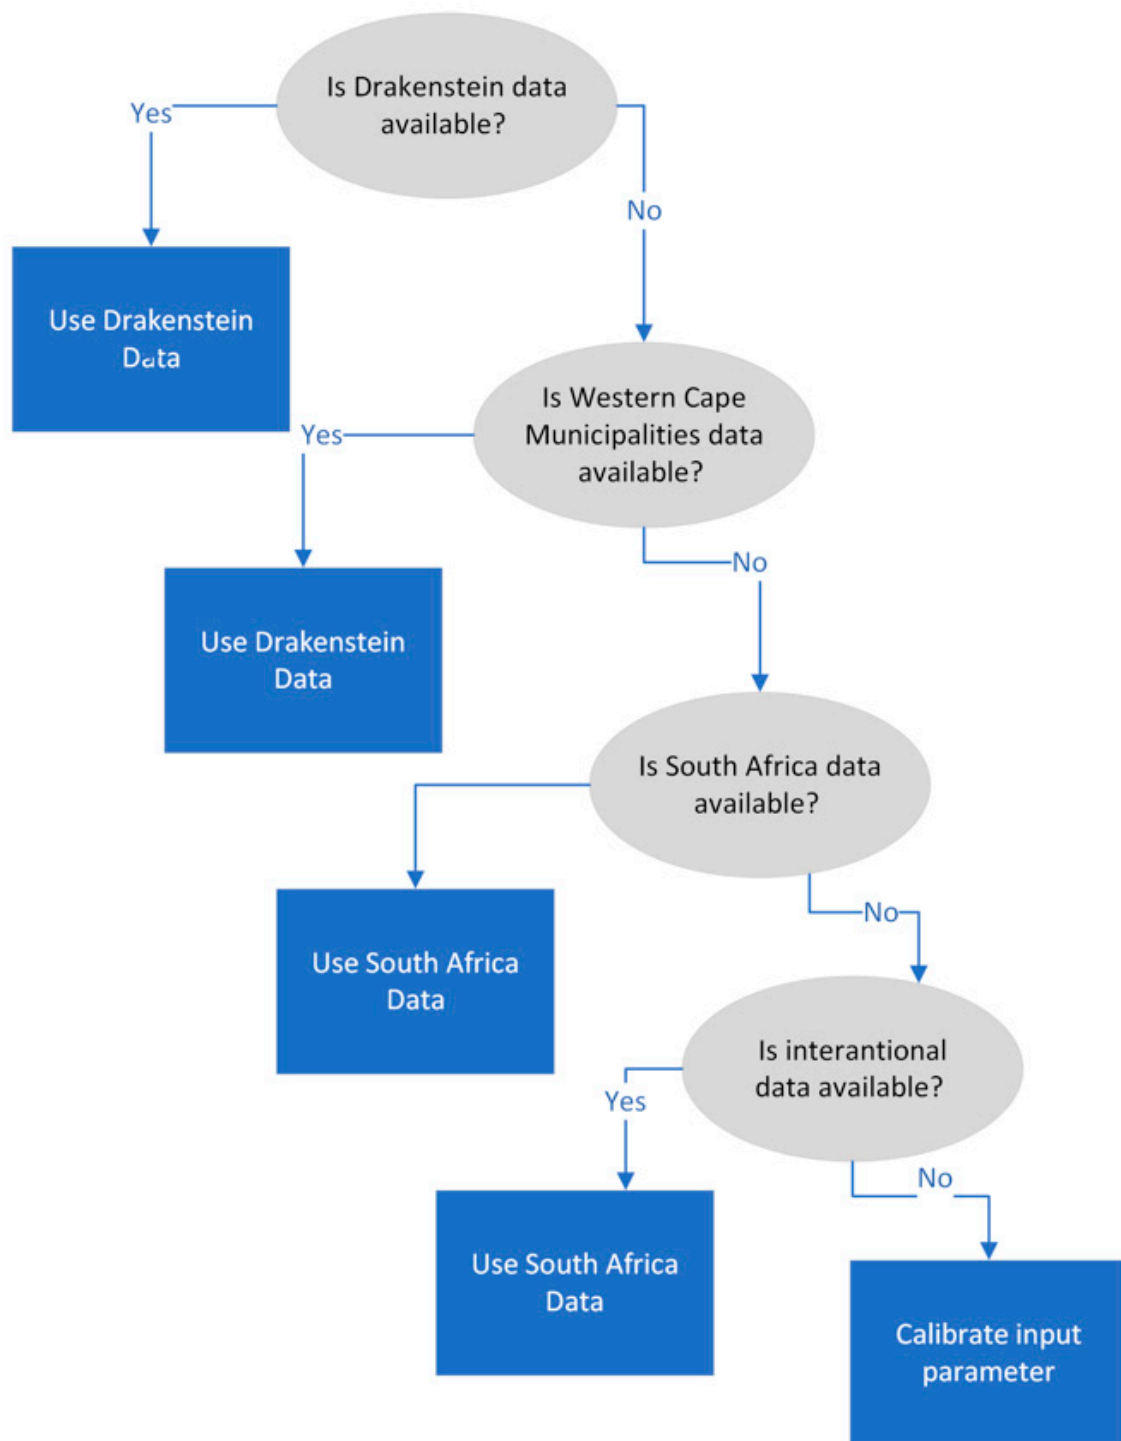

Supplement: s1 [file s1]
